# Supplementary material
Source: PubMed Central journal article supplement (PMC7457382)

# Supplementary figure 1

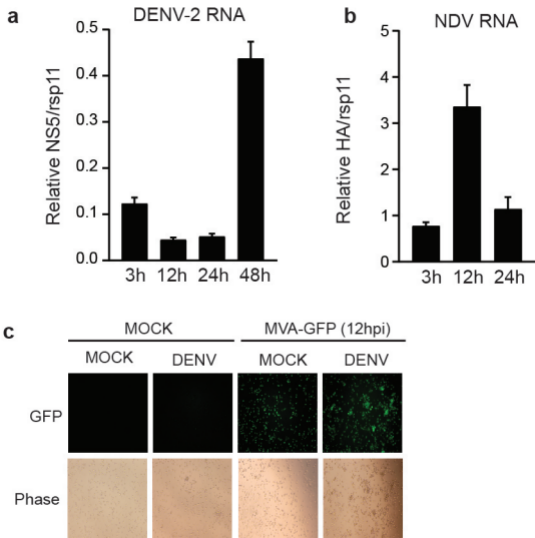

# Supplementary figure 2

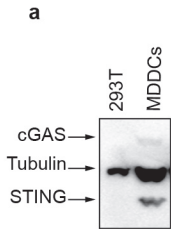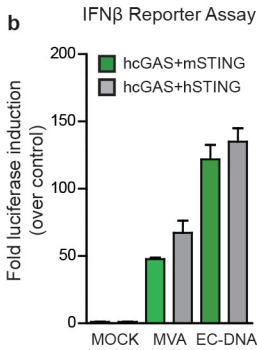

Supplementary figure 3

**a**

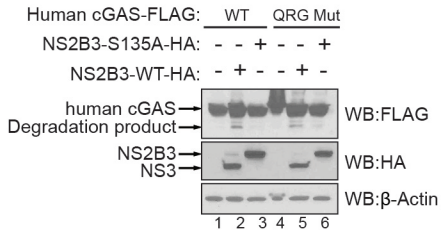

**b**

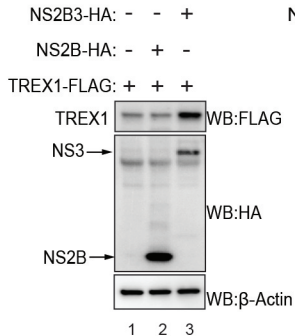

**c**

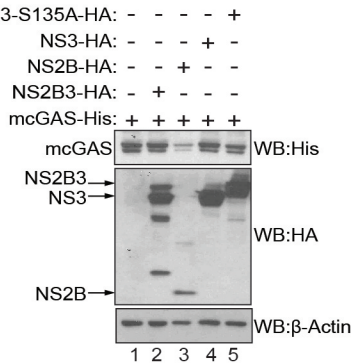

## Supplementary figure 4

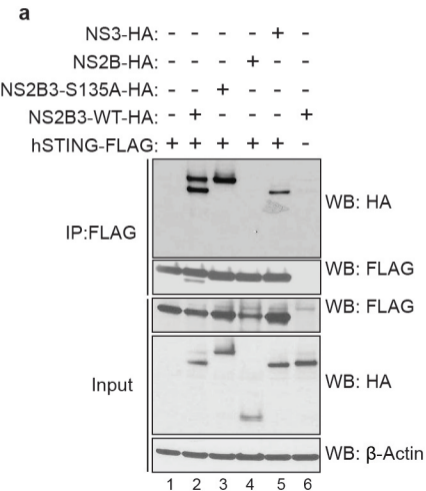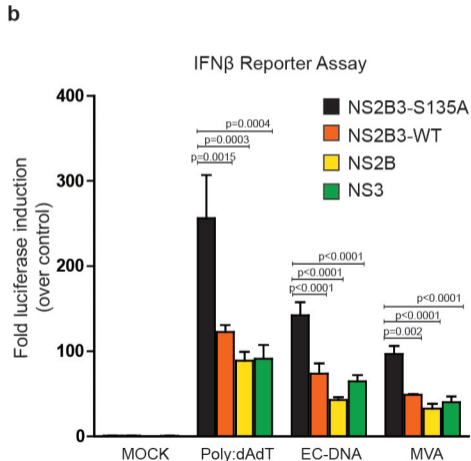

**a**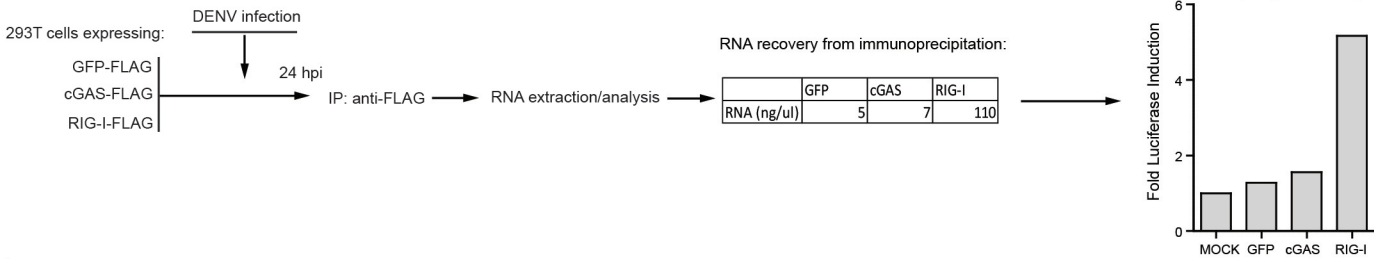**b**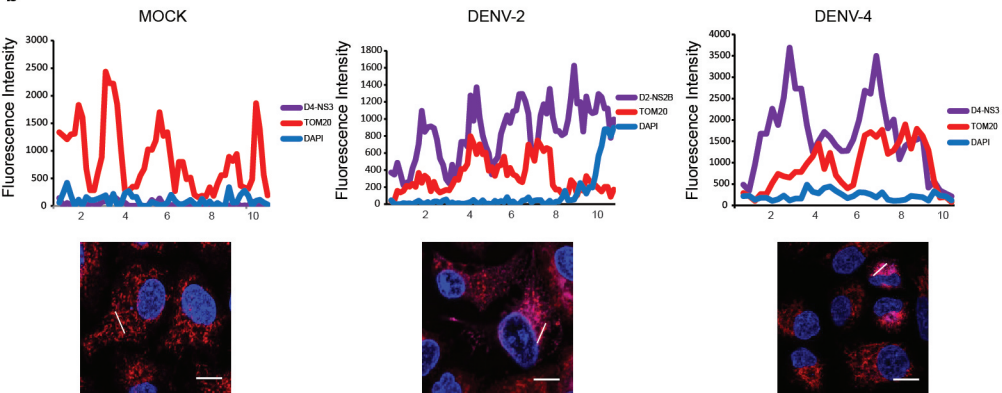

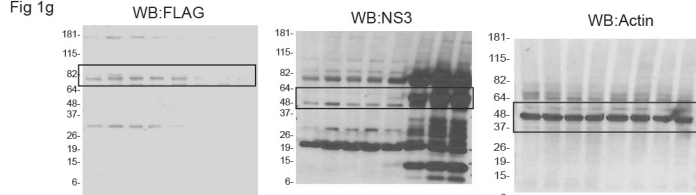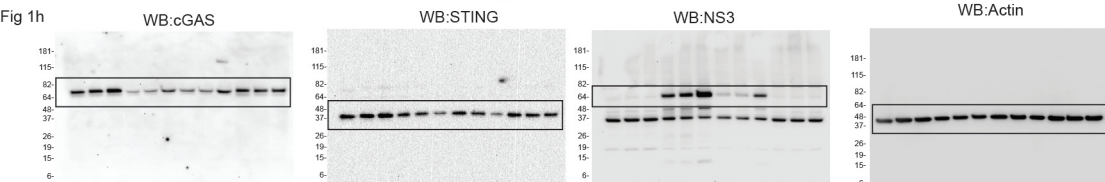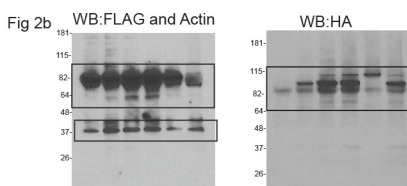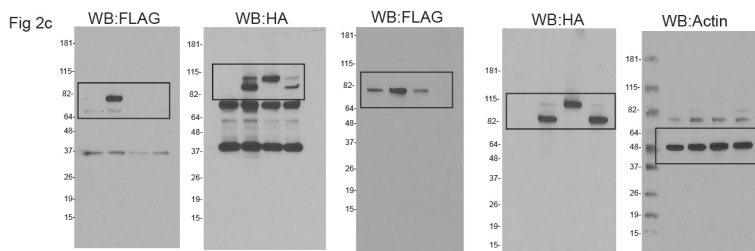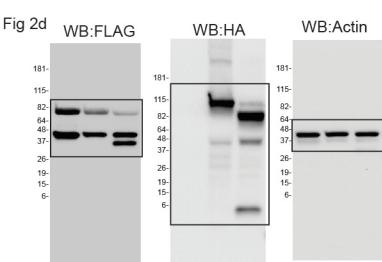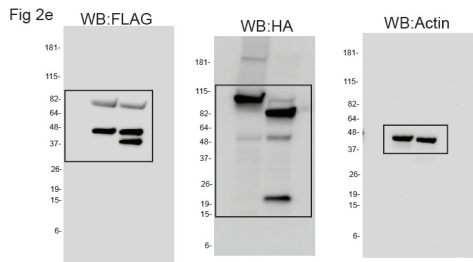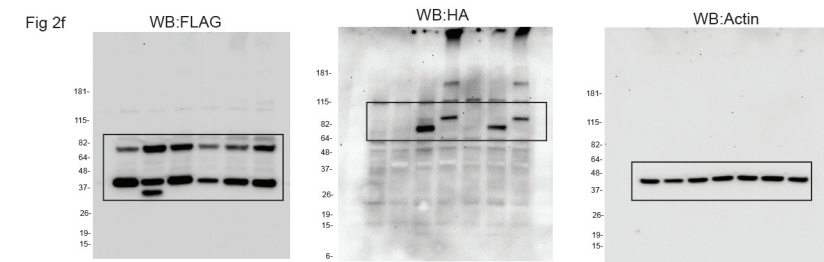

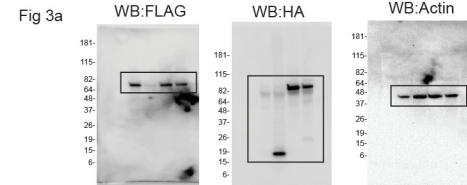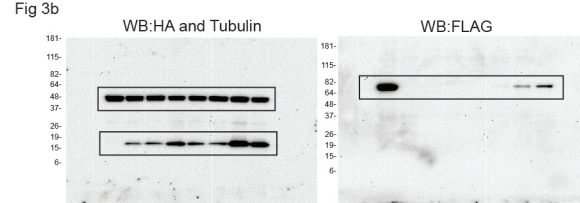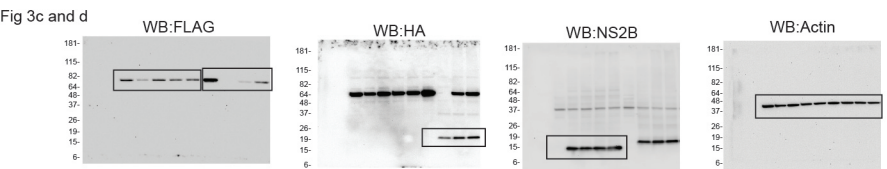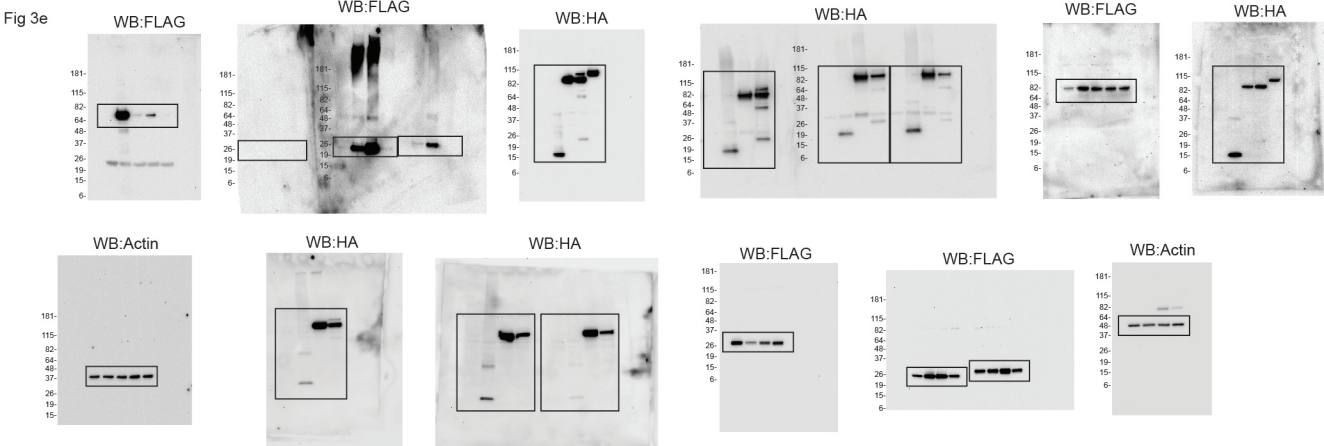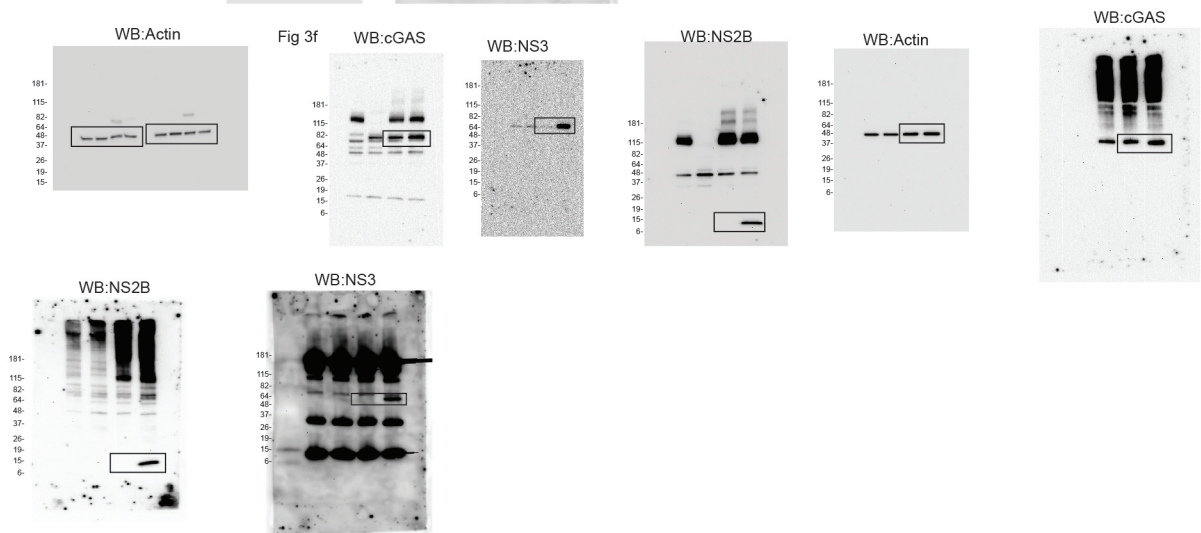

Fig 4a

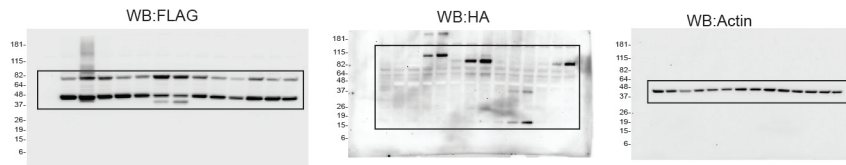

Fig 4b

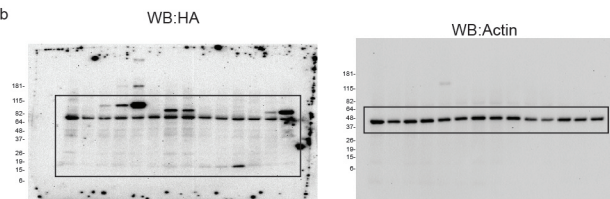

Fig 6a

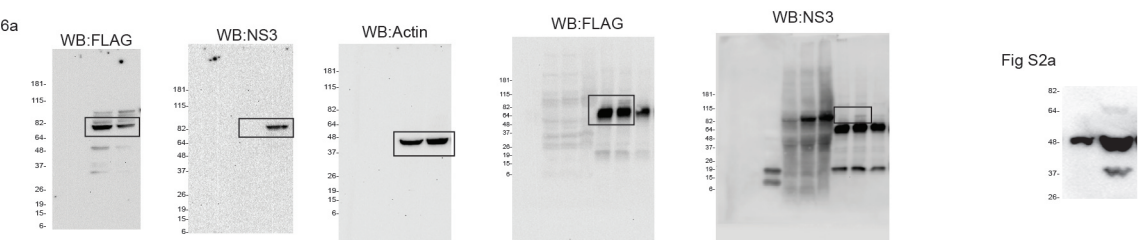

Fig S3a

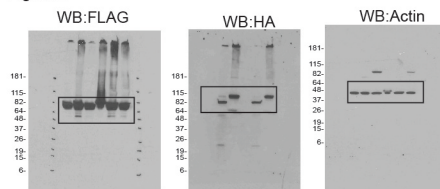

Fig S3b

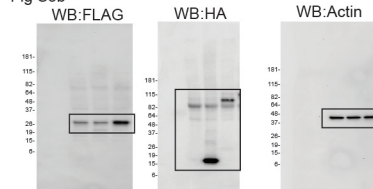

Fig S3c

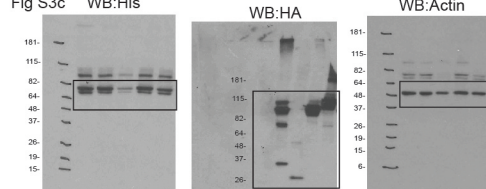

Fig S4a

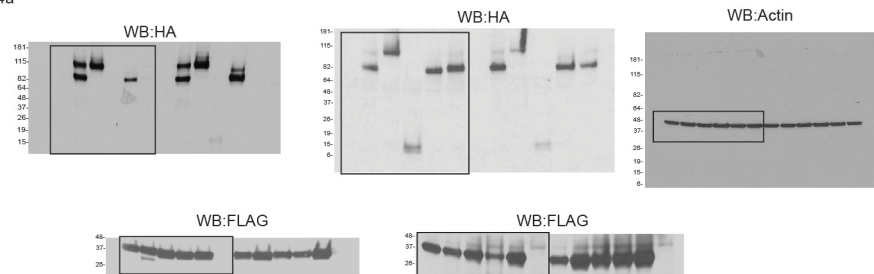

Supplement: NIHMS1057444-supplement-Supplementary_File.pdf [file NIHMS1057444-supplement-Supplementary_File.pdf]
